# Supplementary material
Source: PubMed Central journal article supplement (PMC2574903)

**Supplementary Data for:** “Inhibition of carboxylesterase 1 is associated with enhanced cholesteryl ester retention in human THP-1 monocytes/macrophages.” Crow et al., *Biochim Biophys Acta*.

**Supplementary Figure 1.** Benzil inhibits recombinant CES1 hydrolytic activity, but not bile-salt stimulated porcine pancreatic lipase (CEL). Benzil, at a concentration of 25  $\mu$ M, markedly inhibits recombinant CES1 activity when using *para*-nitrophenyl valerate (pNPV) (**A**) and 4-methylumbelliferyl oleate (4-MUBO) (**B**) as substrates. However, benzil does not inhibit the hydrolytic activity of a representative lipase, CEL, toward 4-methylumbelliferyl oleate (**C**). The non-specific inhibitor paraoxon effectively inhibited both recombinant CES1 and CEL enzymes (**A-C**). The specific activities for each enzyme in the absence of inhibitor (*control*) are given next to the control bar. Chemical structures of the substrates pNPV and 4-MUBO are shown above the graphs. The data are expressed as percent of control, which was set to 100%, and represent the mean  $\pm$  SD ( $n = 3$  experiments).

**Supplementary Figure 2.** Benzil and paraoxon inhibit the esterolytic activity of THP-1 cell lysate using *para*-nitrophenyl valerate (pNPV) as substrate (*left*), but not its lipolytic activity using 4-MUBO as substrate (*right*). The data are expressed as percent of control, which was set to 100%, and represent the mean  $\pm$  SD ( $n = 3$  experiments). The specific activity of THP-1 cell lysates toward pNPV and 4-MUBO were  $46 \pm 2$  and  $1.0 \pm 0.1$  nmol/min/mg protein, respectively.

# Supplementary Figures:

## Supplementary Figure 1

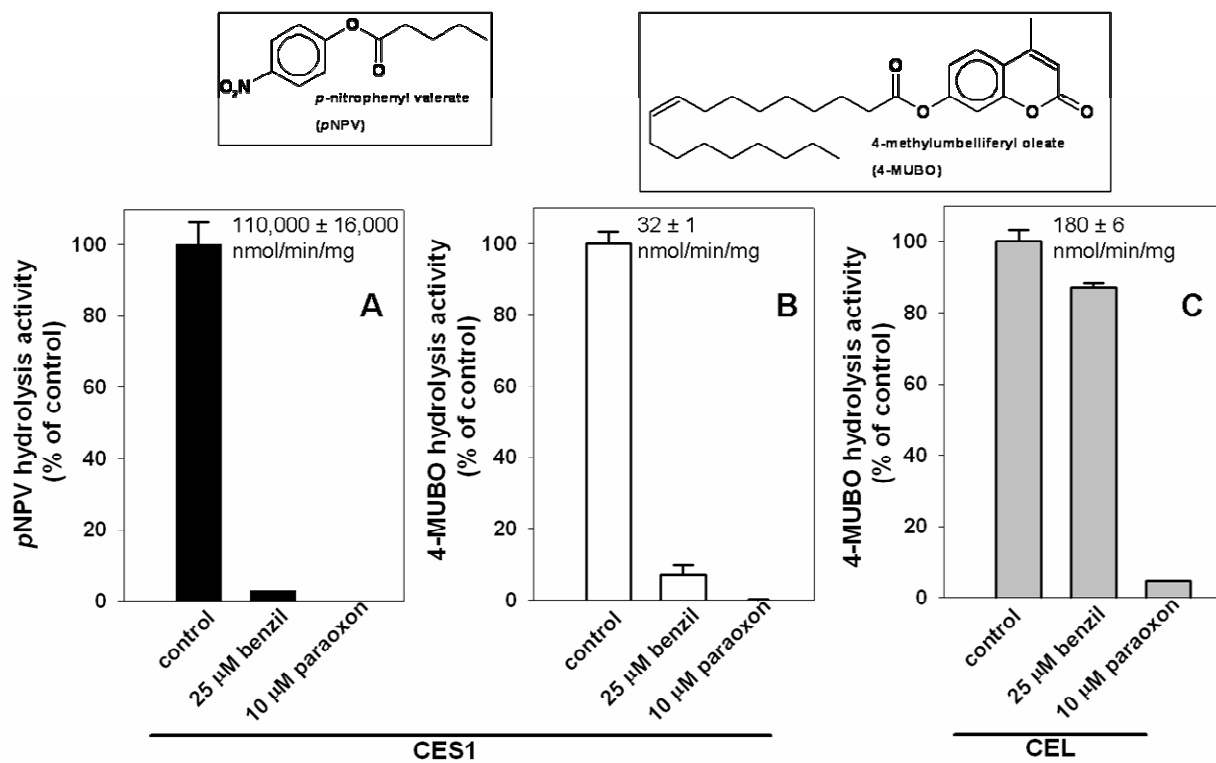

## Supplementary Figure 2

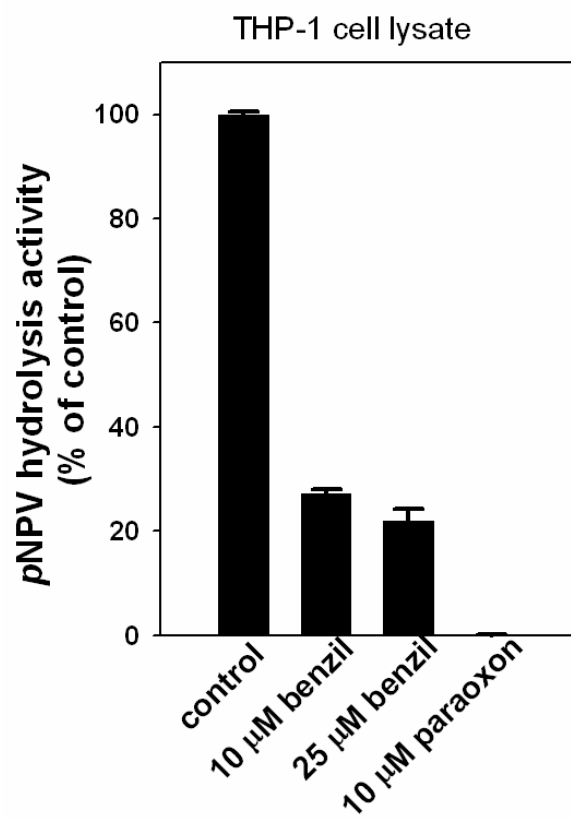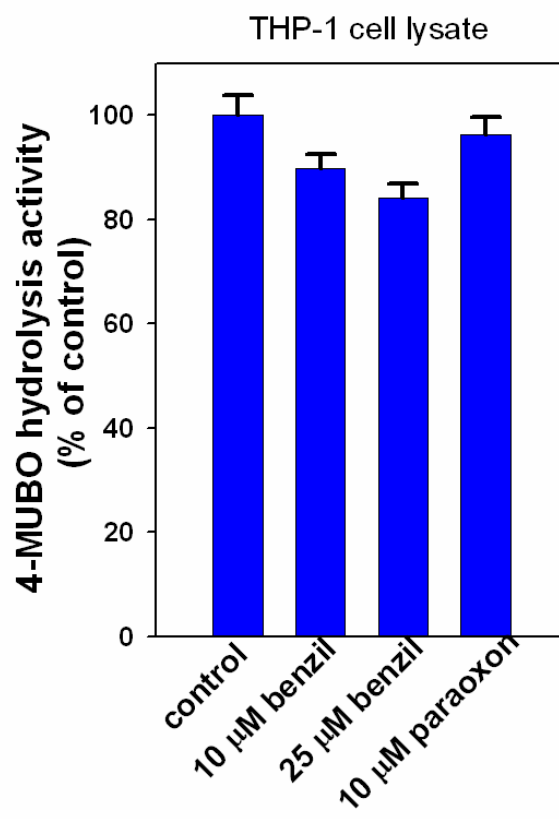

Supplement: NIHMS72061-supplement-supplement_1.pdf [file NIHMS72061-supplement-supplement_1.pdf]
